# Supplementary material for: Near-Roadway Pollution and Childhood Asthma: Implications for Developing “Win–Win” Compact Urban Development and Clean Vehicle Strategies
Source: PubMed Central journal article supplement (PMC3556611; doi:10.1289/ehp.1104785), 2012-09-24
Supplement: ehp.1104785.s001.pdf [file ehp.1104785.s001.pdf]

**Online supplement**

Near-Roadway Pollution and Childhood Asthma: Implications for Developing “Win-Win”  
Compact Urban Development and Clean Vehicle Strategies

Laura Perez, Fred Lurmann, John Wilson, Manuel Pastor, Sylvia J. Brandt, Nino Künzli, Rob  
McConnell

Supplemental Material, Table S1: Yearly number of childhood asthma-related exacerbations attributable to dispersion-modeled near-roadway pollution in combination with reduction of regional NO<sub>2</sub> (top) and regional O<sub>3</sub> (bottom) above background levels in clean communities (scenario 1, dispersion-modeled NOx model) (95% confidence intervals in parentheses)<sup>a</sup>.

|                                             | Estimated number of exacerbations | Exacerbations due to regional air pollution among children with asthma caused by... |                                         |                        | Exacerbations due to other causes among children with asthma caused by near source traffic pollution | Total                   |
|---------------------------------------------|-----------------------------------|-------------------------------------------------------------------------------------|-----------------------------------------|------------------------|------------------------------------------------------------------------------------------------------|-------------------------|
|                                             |                                   | Near source traffic pollution                                                       | caused by near source traffic pollution | all causes             |                                                                                                      |                         |
| <b>NO<sub>2</sub></b>                       |                                   |                                                                                     |                                         |                        |                                                                                                      |                         |
| Bronchitis episodes                         | 124034                            | 8000 (1030, 15890)                                                                  | 57100 (19500, 82700)                    | 65100 (22500, 92800)   | 7250 (1420, 15800)                                                                                   | 72370 (34840, 96960)    |
|                                             | 100%                              | 6.4% (0.8%, 12.8%)                                                                  | 46.1% (15.7%, 66.7%)                    | 52.5% (18.2%, 74.8%)   | 5.8% (1.1%, 12.7%)                                                                                   | 58.4% (28.1%, 78.2%)    |
| Hospital admissions                         | 3131                              | 45 (10, 80)                                                                         | 330 (255, 405)                          | 375 (295, 450)         | 340 (80, 585)                                                                                        | 715 (440, 965)          |
|                                             | 100%                              | 1.5% (0.3%, 2.6%)                                                                   | 10.5% (8.1%, 13.0%)                     | 12.0% (9.4%, 14.4%)    | 10.8% (2.5%, 18.6%)                                                                                  | 22.8% (14.1%, 30.8%)    |
| Emergency room visits                       | 18658                             | 50 (5, 115)                                                                         | 355 (65, 645)                           | 405 (75, 725)          | 2245 (520, 3840)                                                                                     | 2645 (905, 4265)        |
|                                             | 100%                              | 0.3% (0.0%, 0.6%)                                                                   | 1.9% (0.3%, 3.5%)                       | 2.2% (0.4%, 3.9%)      | 12.0% (2.8%, 20.6%)                                                                                  | 14.2% (4.8%, 22.9%)     |
| Doctor visits                               | 240696                            | 1240 (100, 2880)                                                                    | 8800 (1800, 15800)                      | 10100 (2000, 17900)    | 28350 (6630, 48540)                                                                                  | 38440 (15460, 59790)    |
|                                             | 100%                              | 0.5% (0.0%, 1.2%)                                                                   | 3.7% (0.7%, 6.6%)                       | 4.2% (0.8%, 7.4%)      | 11.8% (2.8%, 20.2%)                                                                                  | 16.0% (6.4%, 24.8%)     |
| <b>O<sub>3</sub></b>                        |                                   |                                                                                     |                                         |                        |                                                                                                      |                         |
| Bronchitis episodes                         | 124034                            | 2310 (0, 5500)                                                                      | 16500 (510, 30900)                      | 18790 (590, 34910)     | 12900 (3000, 22800)                                                                                  | 31700 (12400, 48300)    |
|                                             | 100%                              | 1.9% (0.0%, 4.4%)                                                                   | 13.3% (0.4%, 24.9%)                     | 15.1% (0.5%, 28.1%)    | 10.4% (2.4%, 18.3%)                                                                                  | 25.6% (10.0%, 39.0%)    |
| Hospital admissions                         | 3131                              | 2.8 (0.5, 5.6)                                                                      | 19.9 (9.5, 30.6)                        | 22.6 (10.9, 34.3)      | 380 (90, 650)                                                                                        | 400 (110, 680)          |
|                                             | 100%                              | 0.1% (0.0%, 0.2%)                                                                   | 0.6% (0.3%, 1.0%)                       | 0.7% (0.3%, 1.1%)      | 12.2% (2.8%, 20.9%)                                                                                  | 12.9% (3.5%, 21.7%)     |
| Emergency room visits                       | 18658                             | 16 (4, 31)                                                                          | 116 (72, 162)                           | 133 (84, 181)          | 2280 (530, 3900)                                                                                     | 2410 (660, 4040)        |
|                                             | 100%                              | 0.1% (0.0%, 0.2%)                                                                   | 0.6% (0.4%, 0.9%)                       | 0.7% (0.4%, 1.0%)      | 12.2% (2.8%, 20.9%)                                                                                  | 12.9% (3.5%, 21.6%)     |
| Doctor visits                               | 240696                            | 85 (9, 192)                                                                         | 607 (154, 1072)                         | 692 (175, 1207)        | 29500 (6800, 50500)                                                                                  | 30200 (7400, 51200)     |
|                                             | 100%                              | 0.04% (0.004%, 0.1%)                                                                | 0.3% (0.1%, 0.4%)                       | 0.3% (0.1%, 0.5%)      | 12.3% (2.8%, 21.0%)                                                                                  | 12.5% (3.1%, 21.3%)     |
| Missed school days for respiratory diseases | 1350391                           | 41100 (2700, 99400)                                                                 | 288800 (41500, 537300)                  | 329900 (47500, 612100) | 126600 (32100, 233100)                                                                               | 456500 (183100, 715400) |
|                                             | 100%                              | 3.0% (0.2%, 7.4%)                                                                   | 21.4% (3.1%, 39.8%)                     | 24.4% (3.5%, 45.3%)    | 9.4% (2.4%, 17.3%)                                                                                   | 33.8% (13.6%, 53.0%)    |

<sup>a</sup> Reduction in cases is represented by positive values

Supplemental Material, Table S2: Yearly number of childhood asthma-related exacerbations attributable to air pollution (scenario 2, dispersion-modeled NOx model) (95% confidence intervals in parentheses) <sup>a</sup>

|                                                           | Estimated number of exacerbations | Exacerbations due to regional air pollution among children with asthma caused by... |                                         |                     | Exacerbations due to other causes among children with asthma | Total                |
|-----------------------------------------------------------|-----------------------------------|-------------------------------------------------------------------------------------|-----------------------------------------|---------------------|--------------------------------------------------------------|----------------------|
|                                                           |                                   | Near source traffic pollution                                                       | caused by near source traffic pollution | all causes          | due to near source traffic pollution                         |                      |
| <b>NO<sub>2</sub> (O<sub>3</sub> for school absences)</b> |                                   |                                                                                     |                                         |                     |                                                              |                      |
| Bronchitis episodes                                       | 124034                            | 470 (50, 1040)                                                                      | 17500 (4800, 29100)                     | 17900 (4900, 29900) | 2800 (600, 5000)                                             | 20700 (7900, 32600)  |
|                                                           | 100%                              | 0.38% (0.04%, 0.8%)                                                                 | 14.1% (3.8%, 23.4%)                     | 14.5% (3.9%, 24.1%) | 2.2% (0.5%, 4.0%)                                            | 16.7% (6.4%, 26.2%)  |
| Hospital admissions                                       | 3131                              | 2 (0, 4)                                                                            | 75 (60, 95)                             | 80 (60, 95)         | 80 (20, 140)                                                 | 160 (90, 220)        |
|                                                           | 100%                              | 0.07% (0.01%, 0.1%)                                                                 | 2.4% (1.9%, 3.0%)                       | 2.5% (2.0%, 3.1%)   | 2.5% (0.6%, 4.5%)                                            | 5.1% (3.0%, 7.1%)    |
| Emergency room visits                                     | 18658                             | 2 (0, 5)                                                                            | 80 (15, 145)                            | 80 (15, 150)        | 490 (110, 860)                                               | 570 (180, 940)       |
|                                                           | 100%                              | 0.0% (0.0%, 0.0%)                                                                   | 0.2% (0.2%, 0.2%)                       | 0.2% (0.2%, 0.2%)   | 2.6% (0.6%, 4.6%)                                            | 2.8% (0.8%, 4.8%)    |
| Doctor visits                                             | 240696                            | 50 (0, 130)                                                                         | 2010 (400, 3600)                        | 2060 (410, 3700)    | 6200 (1380, 11010)                                           | 8300 (3170, 13360)   |
|                                                           | 100%                              | 0.02% (0.002%, 0.05%)                                                               | 0.8% (0.2%, 1.5%)                       | 0.9% (0.2%, 1.5%)   | 2.6% (0.6%, 4.6%)                                            | 3.4% (1.3%, 5.6%)    |
| School absences                                           | 1350391                           | 685 (2, 1722)                                                                       | 25480 (1390, 49650)                     | 26160 (1420, 50900) | 34700 (1420, 61400)                                          | 60800 (24850, 96970) |
|                                                           | 100%                              | 0.05% (0.0%, 0.1%)                                                                  | 1.9% (0.1%, 3.7%)                       | 1.9% (0.1%, 3.8%)   | 2.6% (0.1%, 4.5%)                                            | 4.5% (1.8%, 7.2%)    |

<sup>a</sup> Reduction in cases is represented by positive value
